# Supplementary material for: Binding of hnRNP I–vRNA Regulates Sindbis Virus Structural Protein Expression to Promote Particle Infectivity
Source: MDPI journal article supplement (doi:10.3390/v14071423), 2022-06-28
Supplement: s1 [file s1]

## SUPPLEMENTAL FIGURE S1

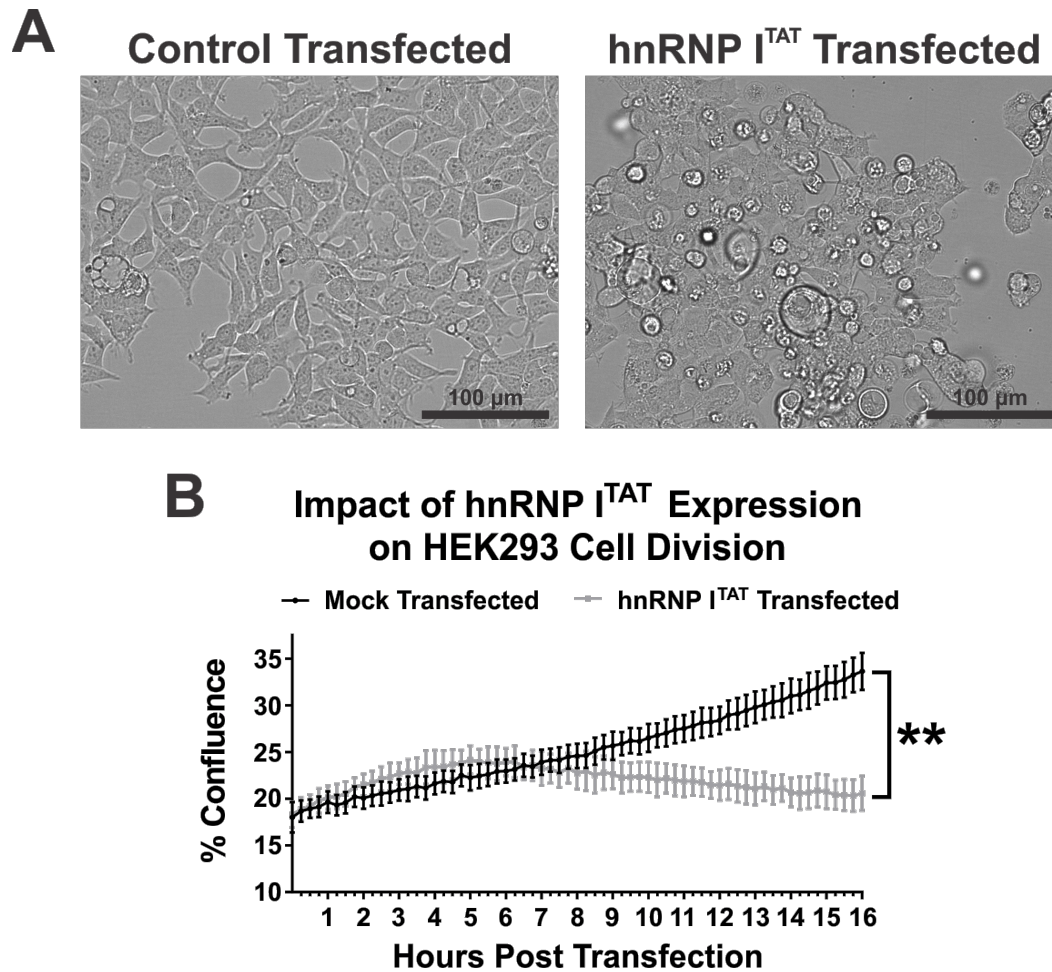

**Supplemental Figure S1- hnRNP I<sup>TAT</sup> Expression Alters Cell Morphology and Negatively Impacts Cell Division.** (A) Representative bright field micrographs of control transfected and hnRNP I<sup>TAT</sup> expression plasmid transfected HEK293 cells. Micrographs were taken using a Cytation 1 imaging multi-mode reader using a 20X objective at 16 hours post transfection. Micrographs were taken using identical imaging settings, and scale bars may be found inset on each micrograph. (B) Cell division, as per % confluence determined via digital phase contrast analysis using the Cytation 1 imaging multi-mode reader, was quantitatively assessed with respect to time. Quantitative data shown is the means of at least 8 biological replicates, with the error bars representing the 95% confidence intervals of the data points. Statistical significance, as determined by Area Under the Curve analysis is indicated alongside the specific comparisons (with \*\*  $\leq 0.01$ ).
